# Supplementary material
Source: PubMed Central journal article supplement (PMC1052011)
Supplement: JCI0524405sd.pdf [file JCI0524405sd.pdf]

- S1. Ingwall, J.S., and Weiss, R.G. 2004. Is the failing heart energy starved? On using chemical energy to support cardiac function. *Circ. Res.* **95**:135–145.
- S2. Ingwall, J.S., et al. 1985. The creatine kinase system in normal and diseased human myocardium. *N. Engl. J. Med.* **313**:1050–1054.
- S3. Tian, R., Nascimben, L., Kaddurah-Daouk, R., and Ingwall, J.S. 1996. Depletion of energy reserve via the creatine kinase reaction during the evolution of heart failure in cardiomyopathic hamsters. *J. Mol. Cell. Cardiol.* **28**:755–765.
- S4. Beer, M., et al. 2002. Absolute concentrations of high-energy phosphate metabolites in normal, hypertrophied, and failing human myocardium measured noninvasively with (31)P-SLOOP magnetic resonance spectroscopy. *J. Am. Coll. Cardiol.* **40**:1267–1274.
- S5. Tian, R., Musi, N., D’Agostino, J., Hirshman, M.F., and Goodyear, L.J. 2001. Increased adenosine monophosphate-activated protein kinase activity in rat hearts with pressure-overload hypertrophy. *Circulation.* **104**:1664–1669.
- S6. Shen, W., et al. 1999. Progressive loss of myocardial ATP due to a loss of total purines during the development of heart failure in dogs: a compensatory role for the parallel loss of creatine. *Circulation.* **100**:2113–2118.
- S7. Sharov, V.G., Goussev, A., Lesch, M., Goldstein, S., and Sabbah, H.N. 1998. Abnormal mitochondrial function in myocardium of dogs with chronic heart failure. *J. Mol. Cell. Cardiol.* **30**:1757–1762.
- S8. Sabbah, H.N., et al. 1992. Mitochondrial abnormalities in myocardium of dogs with chronic heart failure. *J. Mol. Cell. Cardiol.* **24**:1333–1347.
